# Supplementary material for: Dynamic self-assembly of charged colloidal strings and walls in simple fluid flows
Source: Royal Society of Chemistry journal article supplement (doi:10.1039/c6sm02524b), 2017-01-01
Supplement: c6sm02524b8.pdf [file c6sm02524b8.pdf]

Supplementary Video captions:

Supplementary Video 1: Colloidal strings in the narrow microfluidic channel at a flow rate of 3.0  $\mu\text{L}/\text{min}$ . The average diameter of particles is 1.36  $\mu\text{m}$ . The field of view of the video is  $128.9 \times 96.4 \mu\text{m}^2$ . The duration of the video is 2 s.

Supplementary Video 2: Colloidal strings in the wide microfluidic channel at a flow rate of 9.0  $\mu\text{L}/\text{min}$ . The video was taken at the center of the wide channel. The average diameter of particles is 1.36  $\mu\text{m}$ . The field of view of the video is  $96.7 \times 128.9 \mu\text{m}^2$ . The duration of the video is 2 s.

Supplementary Video 3: Kinetics of the formation of a stable particle pair in the wide microfluidic channel at a flow rate of 3.0  $\mu\text{L}/\text{min}$ . The field of view of the video is  $107.1 \times 18.1 \mu\text{m}^2$ . The duration of the video is 2.31 s.

Supplementary Video 4: Kinetics of the formation of a stable short colloidal strings of three particles in the wide microfluidic channel at a flow rate of 3.0  $\mu\text{L}/\text{min}$ . The field of view of the video is  $46.6 \times 14.8 \mu\text{m}^2$ . The duration of the video is 7.5 s.

Supplementary Video 5: Kinetics of the formation of a stable short colloidal strings of four particles in the wide microfluidic channel at a flow rate of 3.0  $\mu\text{L}/\text{min}$ . The field of view of the video is  $46.6 \times 14.8 \mu\text{m}^2$ . The duration of the video is 4 s.

Supplementary Video 6: Colloidal strings in the ITO microfluidic channel under a transverse AC electric field. The average diameter of particles is 1.36  $\mu\text{m}$ . The field of view of the video is  $120.2 \times 74.9 \mu\text{m}^2$ . The duration of the video is 1.38 s.
